# Supplementary material for: A lithium-ion battery recycling technology based on a controllable product morphology and excellent performance
Source: Royal Society of Chemistry journal article supplement (doi:10.1039/d1ta06106b), 2021-01-01
Supplement: d1ta06106b1.pdf [file d1ta06106b1.pdf]

1

## Supporting Information

2

### Lithium-ion Batteries Recycling Technology Based on

3

### Controllable Product Morphology and Excellent

4

### Performance

5 *Jiao Lin<sup>a,b</sup>, Ersha Fan<sup>a,b,d</sup>, Xiaodong Zhang<sup>a,b</sup>, Ruling Huang<sup>a</sup>, Xixue Zhang<sup>a</sup>, Renjie*

6 *Chen<sup>a,c,d\*</sup>, Feng Wu<sup>a,b,c,d</sup>, Li Li<sup>a,b,c,d\*</sup>*

7 a. Beijing Key Laboratory of Environmental Science and Engineering, School of

8 Materials Science and Engineering, Beijing Institute of Technology, Beijing 100081,

9 China.

10 b. Guangdong Key Laboratory of Battery Safety, Guangzhou Institute of Energy

11 Testing, Guangzhou, Guangdong 511447, China.

12 c. Collaborative Innovation Center of Electric Vehicles in Beijing, Beijing 100081,

13 China.

14 d. Advanced Technology Research Institute, Beijing Institute of Technology, Jinan

15 250300, China

16 Corresponding authors: Renjie Chen, Li Li

17 E-mail: chenrj@bit.edu.cn,

[lily863@bit.edu.cn](mailto:lily863@bit.edu.cn)

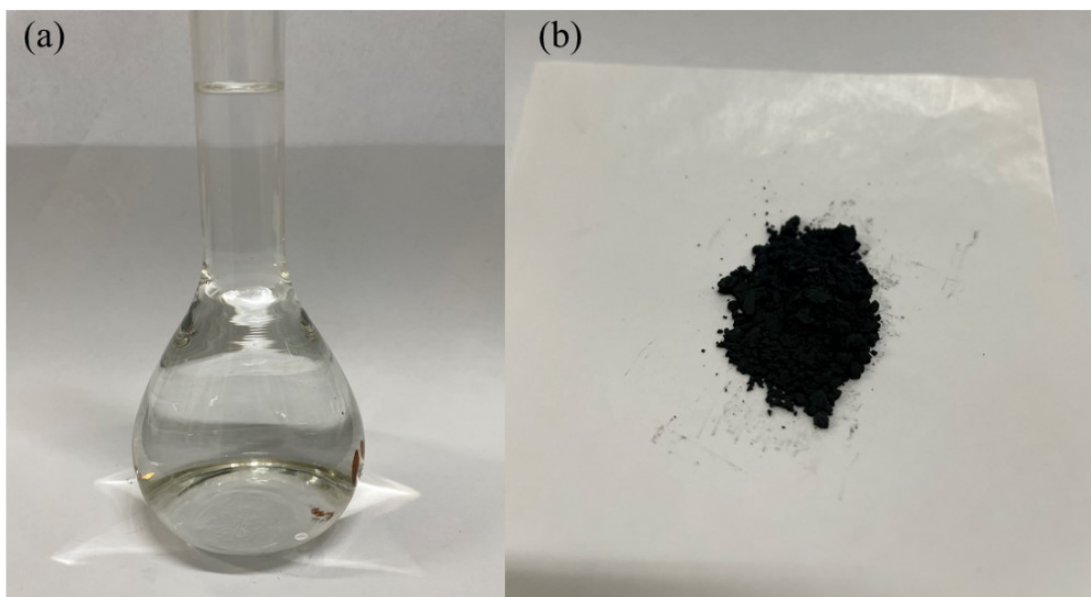

Figure S1 The separated  $\text{Li}_2\text{SO}_4$  solution and  $\text{Co}_3\text{O}_4$  powder.

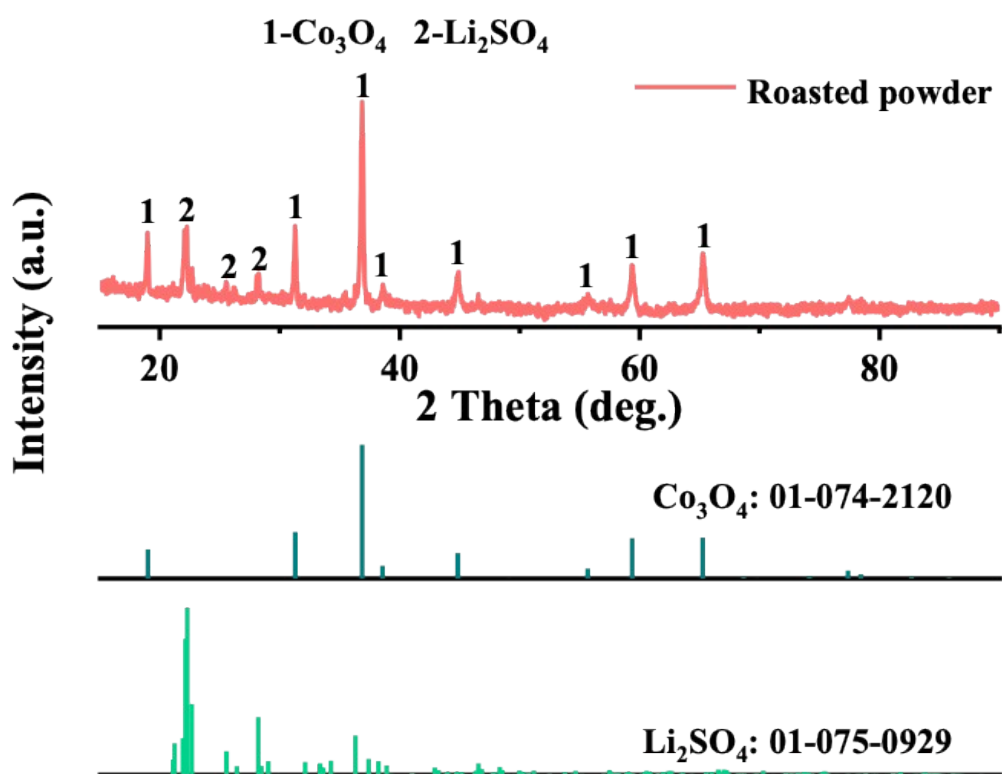

Figure S2 XRD patterns of the roasted powder.

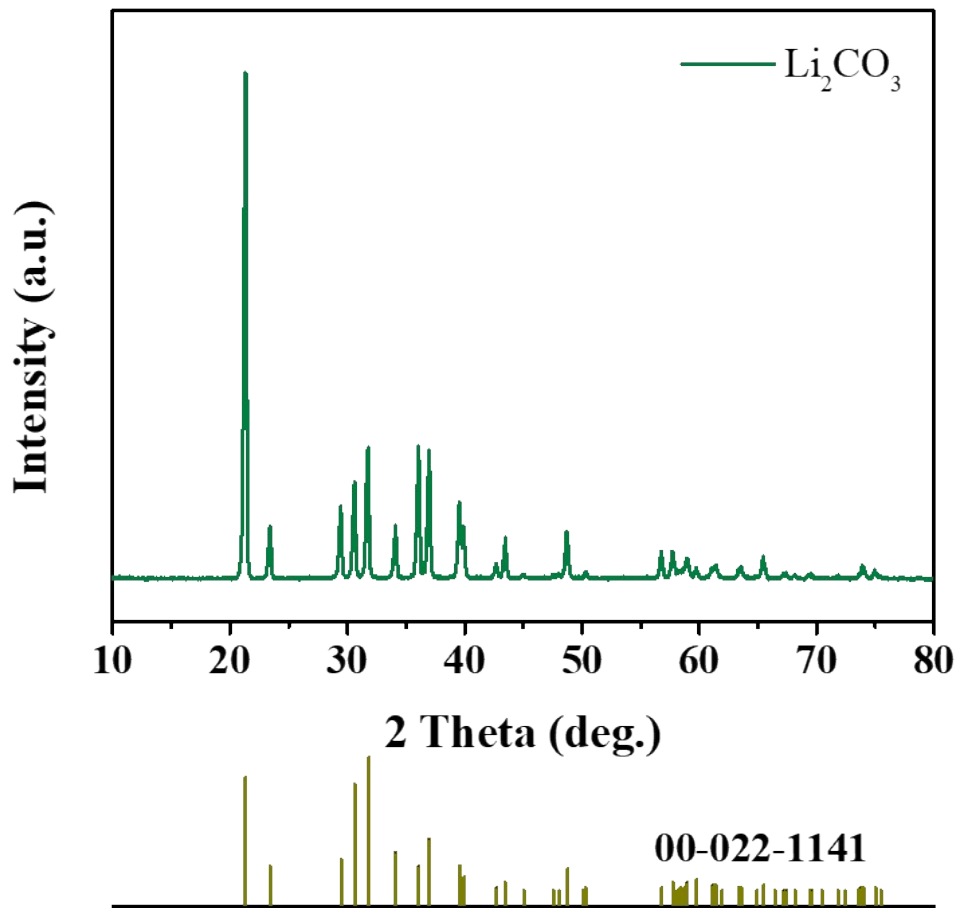

**Figure S3** The XRD patterns of the  $\text{Li}_2\text{CO}_3$  powder.

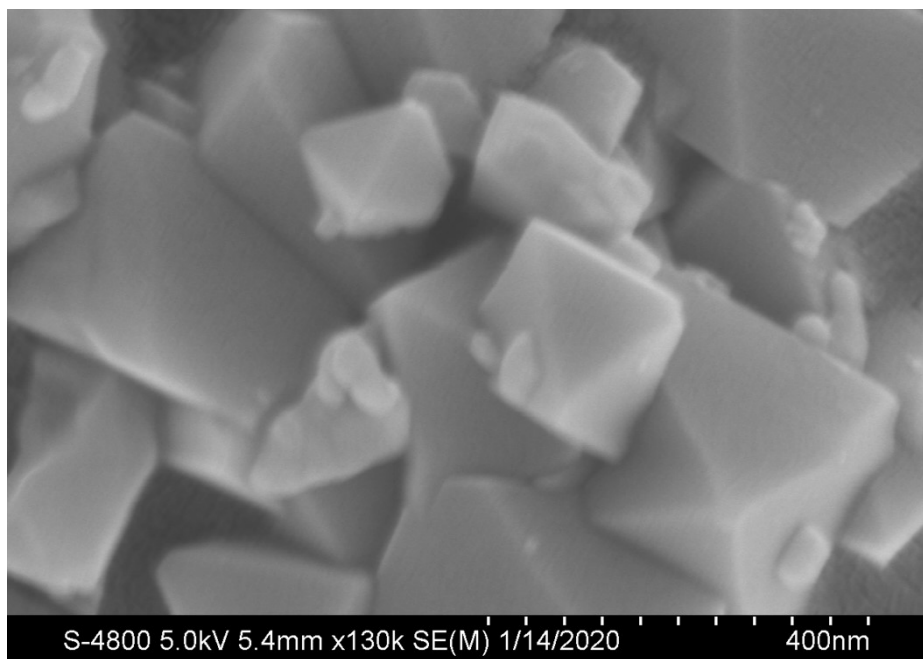

**Figure S4** SEM images of  $\text{Co}_3\text{O}_4$  particles

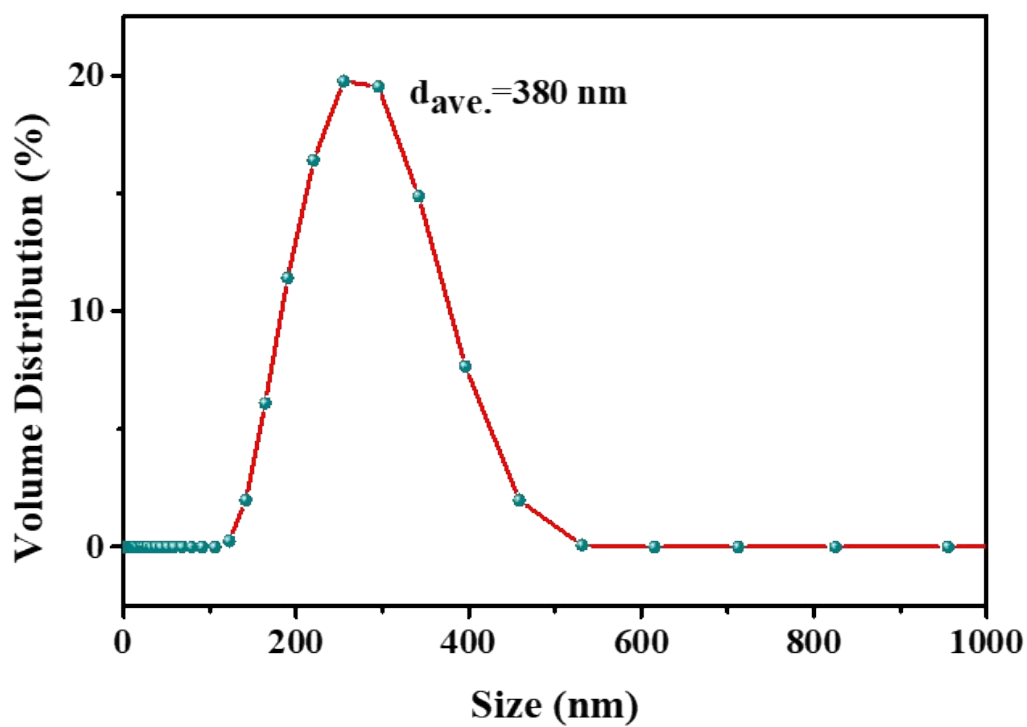

Figure S5 Particle size analysis results of the  $\text{Co}_3\text{O}_4$  particles

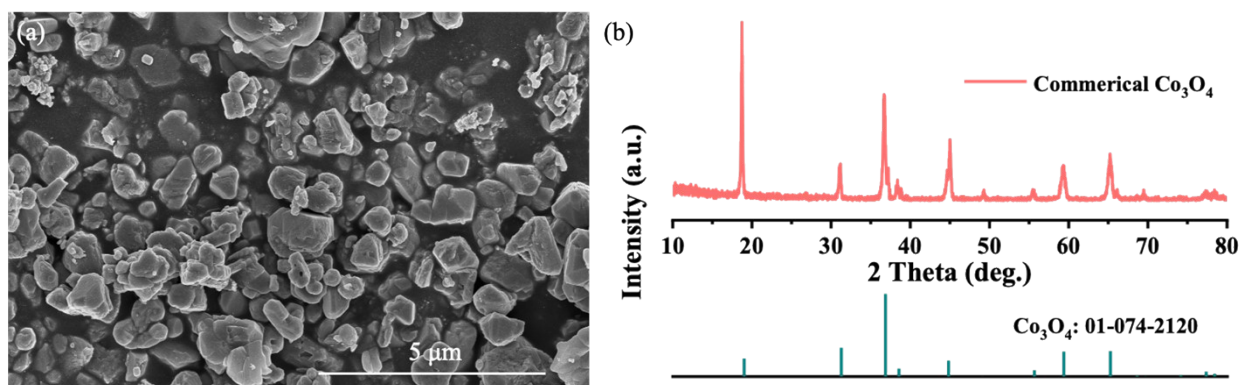

Figure S6 (a)SEM image and (b)XRD patterns of commercial  $\text{Co}_3\text{O}_4$  powder.

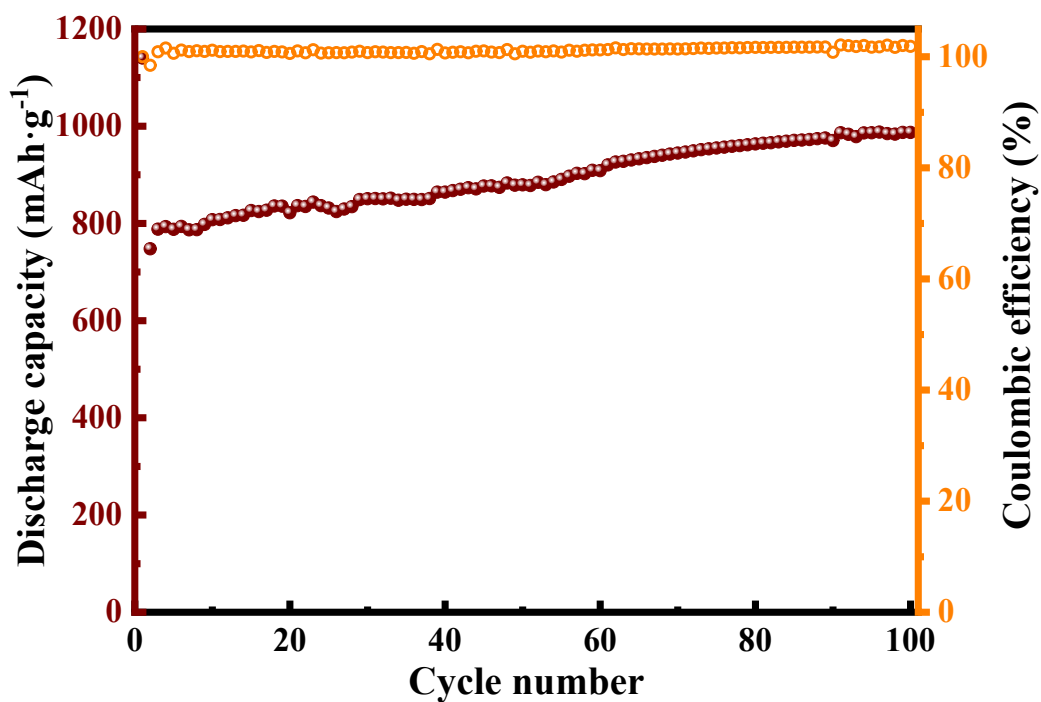

Figure S7 Cycle performance of the nano- $\text{Co}_3\text{O}_4$  electrode at a current density of  $50 \text{ mA g}^{-1}$ .

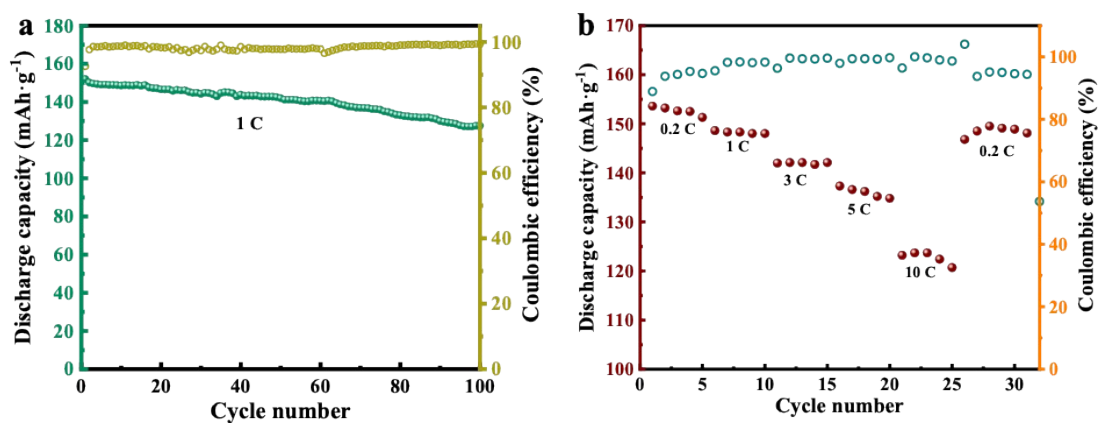

Figure S8 (a) Cycle performance of the re-synthesized  $\text{LiCoO}_2$  powder at 1C ( $1\text{C}=150 \text{ mA h/g}$ ), (b) Discharge curves for the re-synthesized  $\text{LiCoO}_2$  powder at different current densities

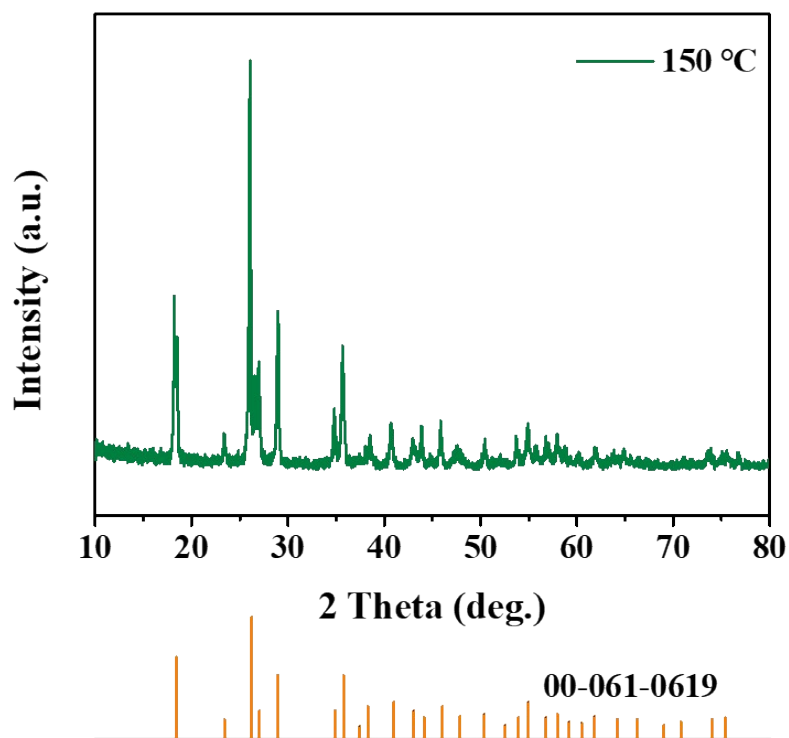

**Figure S9** The XRD patterns of scrap  $\text{CoSO}_4 \cdot 7\text{H}_2\text{O}$  powder. (The powder was obtained by heating  $\text{CoSO}_4 \cdot 7\text{H}_2\text{O}$  to  $150^\circ\text{C}$  for 20min.)

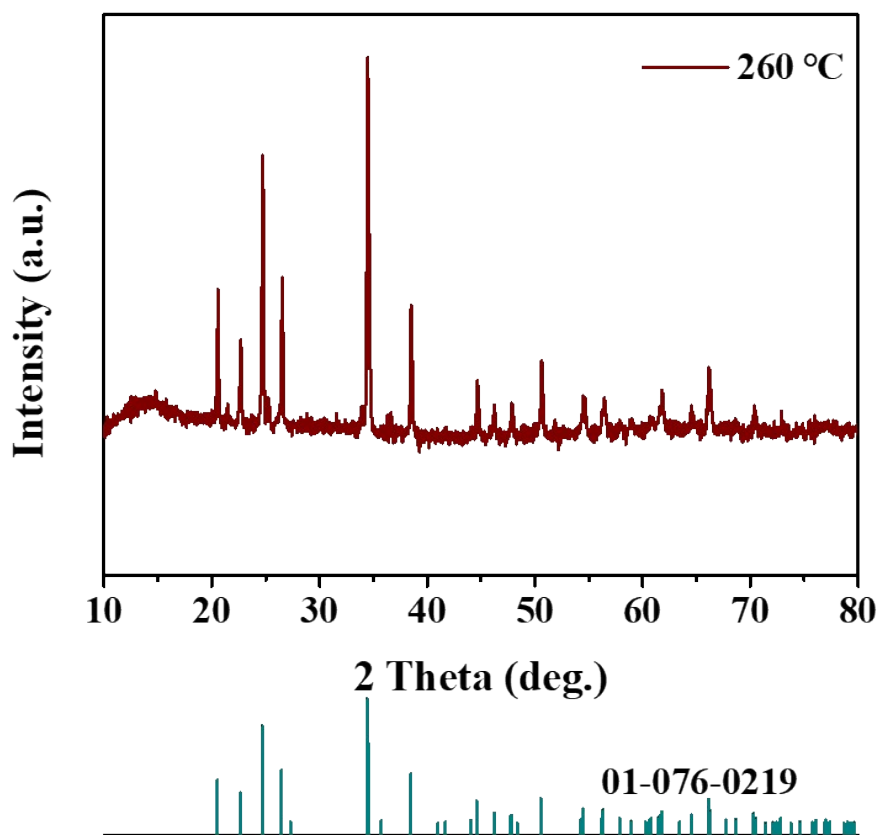

**Figure S10** The XRD patterns of scrap  $\text{CoSO}_4 \cdot 7\text{H}_2\text{O}$  powder. (The powder was obtained by heating  $\text{CoSO}_4 \cdot 7\text{H}_2\text{O}$  to  $260^\circ\text{C}$  for 20min.)

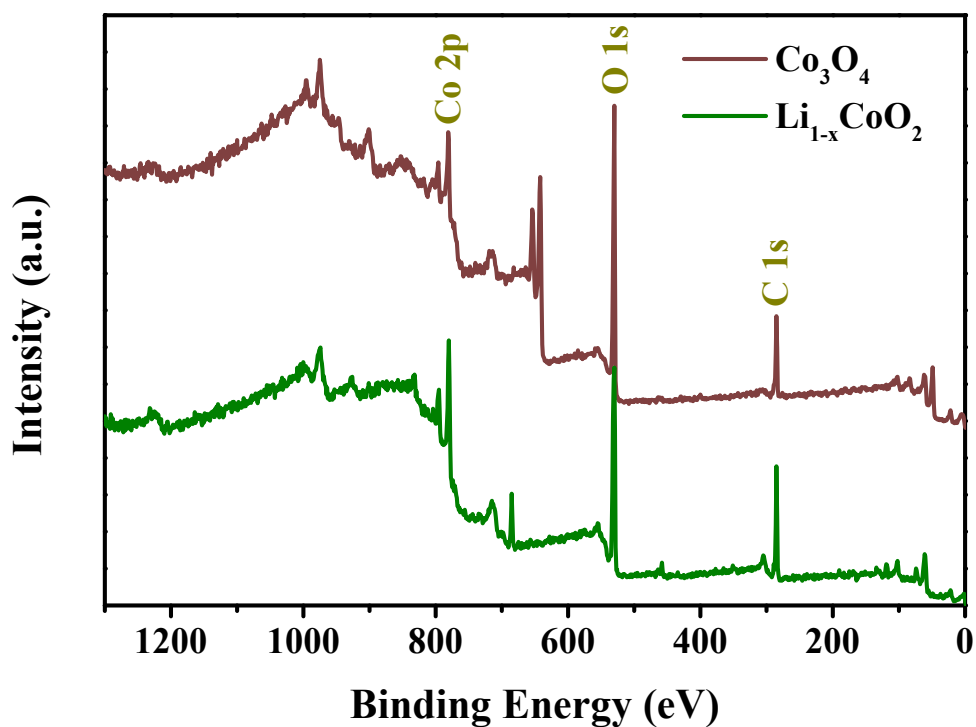

Figure S11 The XPS survey spectra of the  $\text{Li}_{1-x}\text{CoO}_2$  and  $\text{Co}_3\text{O}_4$ .

Table S1 A brief review of published laboratory work on  $\text{Co}_3\text{O}_4$

| NO. | Sample                                   | Initial capacity (mA h/g) | Charge/discharge condition          | Performance (mA h/g) | Ref.      |
|-----|------------------------------------------|---------------------------|-------------------------------------|----------------------|-----------|
| 1   | nanoparticles                            | 1140                      | 50 mA/g, 100 cycles                 | 987.2                | This work |
| 2   | $\text{Co}_3\text{O}_4$ @Carbon Nanotube | 1250                      | 100 mA/g, 60 cycles                 | 781                  | [1]       |
| 3   | nanotube                                 | 928                       | 50 mA/g, 80 cycles                  | 380                  | [2]       |
| 4   | nanoparticles                            | 1109                      | 50 mA/g, 30 cycles                  | 970                  | [3]       |
| 5   | hollow microspheres                      | 1087.2                    | 50 mA/g, 30 cycles                  | 792.7                | [4]       |
| 6   | nanoparticles                            | 1118.5                    | 100 mA/g, 200 cycles                | 955.5                | [5]       |
| 7   | hollow-structured                        | 1107                      | 50 mA/g, 50 cycles                  | 880                  | [6]       |
| 8   | porous nanoflaked                        | 1108                      | 0.2 C, (1 C = 890 mA/g), 100 cycles | 908                  | [7]       |
| 9   | MOF                                      | 1200                      | 200 mA/g, 100 cycles                | 924.1                | [8]       |

Table S2 The fit result of EIS parameters

| Samples | Element ( $\Omega$ ) |          |             |             |           |           |           |
|---------|----------------------|----------|-------------|-------------|-----------|-----------|-----------|
|         | $R_s$                | $R_{ct}$ | $CPE_{1-T}$ | $CPE_{1-P}$ | $W_{1-R}$ | $W_{1-T}$ | $W_{1-P}$ |
|         |                      |          |             |             |           |           |           |

|                                               |       |       |               |         |       |         |         |
|-----------------------------------------------|-------|-------|---------------|---------|-------|---------|---------|
| <b>Nano-Co<sub>3</sub>O<sub>4</sub></b>       | 3.175 | 66.78 | 0.000003.4241 | 0.76968 | 137.8 | 0.27638 | 0.58672 |
| <b>Commercial Co<sub>3</sub>O<sub>4</sub></b> | 1.95  | 146.2 | 0.00015207    | 0.56753 | 306.1 | 0.52531 | 0.69768 |

**Table S3** Refined lattice parameters of all samples

| <b>Samples</b>                                       | <b>a</b> | <b>c</b> | <b>volume</b> | <b>c/a</b> | <b>I<sub>(003)</sub>/I<sub>(104)</sub></b> | <b>I<sub>(006)</sub>+I<sub>(012)</sub>/I<sub>(104)</sub></b> |
|------------------------------------------------------|----------|----------|---------------|------------|--------------------------------------------|--------------------------------------------------------------|
| <b>Li<sub>1-x</sub>CoO<sub>2</sub></b>               | 2.8144   | 14.0408  | 96.3149       | 4.9889     | 3.0347                                     | 0.9275                                                       |
| <b>Co<sub>3</sub>O<sub>4</sub>→LiCoO<sub>2</sub></b> | 2.8143   | 14.0451  | 96.3356       | 4.9907     | 5.0975                                     | 0.4035                                                       |
| <b>Commercial LiCoO<sub>2</sub></b>                  | 2.8159   | 14.0499  | 96.4798       | 4.9895     | 12.1334                                    | 0.7169                                                       |

**Table S4** Peak binding energies for all deconvoluted C 1s, O 1s and Co 2p peaks from XPS.

| <b>Peak</b>  | <b>Peak binding energy</b>             |                                    |        |
|--------------|----------------------------------------|------------------------------------|--------|
|              | <b>Li<sub>1-x</sub>CoO<sub>2</sub></b> | <b>Co<sub>3</sub>O<sub>4</sub></b> |        |
| <b>C 1s</b>  | 284.8                                  | 284.8                              |        |
|              | 285.97                                 | 286.25                             |        |
|              | 288.66                                 | 288.3                              |        |
| <b>O 1s</b>  | 529.21                                 | 529.87                             |        |
|              | 529.75                                 | 531.37                             |        |
|              | 531.4                                  | 532.54                             |        |
| <b>Co 2p</b> | Co <sub>I</sub> P3                     | 779.27                             | 780.04 |
|              | Co <sub>I</sub> P1                     | 794.35                             | 795.34 |
|              | Co <sub>II</sub> P3                    | 780.62                             | 781.51 |
|              | Co <sub>II</sub> P1                    | 795.86                             | 796.87 |



**Table S5** Electronic configuration of Co ion

| Co ion           | Atomic orbital (3d) |   |   |   |   |
|------------------|---------------------|---|---|---|---|
| Co <sup>3+</sup> | ↑                   | ↑ | ↑ | ↑ |   |
| Co <sup>2+</sup> | ↑                   | ↑ | ↑ | ↑ | ↑ |

**Table S6** The bond length of the reactants

| LiCoO <sub>2</sub> | Bond length/Å |
|--------------------|---------------|
| Li-O               | 1.63147       |
| Li-Co              | 1.61547       |
| Co=O               | 1.56039       |
| CoSO <sub>4</sub>  | Bond length/Å |
| S=O                | 1.42715       |
| S-O                | 1.61271       |
| Co-O               | 1.77578       |

**Reference:**

- Gu, D.; Li, W.; Wang, F.; Bongard, H.; Spliethoff, B.; Schmidt, W.; Weidenthaler, C.; Xia, Y.; Zhao, D.; Schuth, F., Controllable Synthesis of Mesoporous Peapod-like Co<sub>3</sub>O<sub>4</sub>@Carbon Nanotube Arrays for High-Performance Lithium-Ion Batteries. *Angew Chem Int Ed Engl* **2015**, *127*, 7166-7170.
- Lou, X. W.; Deng, D.; Lee, J. Y.; Feng, J.; Archer, L. A., Self-Supported Formation of Needlelike Co<sub>3</sub>O<sub>4</sub> Nanotubes and Their Application as Lithium-Ion Battery Electrodes. *Advanced Materials* **2008**, *20* (2), 258-262.
- Yan, N.; Hu, L.; Li, Y.; Wang, Y.; Zhong, H.; Hu, X.; Kong, X.; Chen, Q., Co<sub>3</sub>O<sub>4</sub> Nanocages for High-Performance Anode Material in Lithium-Ion Batteries. *The Journal of Physical Chemistry C* **2012**, *116* (12), 7227-7235.

- 
4. Wang, J.; Yang, N.; Tang, H.; Dong, Z.; Jin, Q.; Yang, M.; Kisailus, D.; Zhao, H.; Tang, Z.; Wang, D., Accurate control of multishelled Co<sub>3</sub>O<sub>4</sub> hollow microspheres as high-performance anode materials in lithium-ion batteries. *Angew Chem Int Ed Engl* **2013**, *52* (25), 6417-6420.
  5. Xu, G.-L.; Li, J.-T.; Huang, L.; Lin, W.; Sun, S.-G., Synthesis of Co<sub>3</sub>O<sub>4</sub> nano-octahedra enclosed by facets and their excellent lithium storage properties as anode material of lithium ion batteries. *Nano Energy* **2013**, *2* (3), 394-402.
  6. Deli Wang, Y. Y., Huan He, Jie Wang, Weidong Zhou, and Hector D. Abru~na,, Template-Free Synthesis of HollowStructured Co<sub>3</sub>O<sub>4</sub> Nanoparticles. *ACS nano* **2015**, *9* (2), 1775-1781.
  7. Wen, J.; Xu, L.; Wang, J.; Xiong, Y.; Ma, J.; Jiang, C.; Cao, L.; Li, J.; Zeng, M., Lithium and potassium storage behavior comparison for porous nanoflaked Co<sub>3</sub>O<sub>4</sub> anode in lithium-ion and potassium-ion batteries. *Journal of Power Sources* **2020**, *474*.
  8. Y.-H.; Li, J.-H.; Xu, Z.-F.; Liu, J.-M.; Liu, S.-J.; Wang, R.-X., Metal–organic framework derived porous nanostructured Co<sub>3</sub>O<sub>4</sub> as high-performance anode materials for lithium-ion batteries. *Journal of Materials Science* **2021**, *56* (3), 2451-2463.
